# Supplementary material for: Mental health of healthcare professionals during the ongoing COVID-19 pandemic: a comparative investigation from the first and second pandemic years
Source: HighWire-hosted journal article supplement (doi:10.1136/bmjopen-2022-067244), 2023-03-01
Supplement: bmjopen-2022-067244supp001_data_supplement.pdf [file bmjopen-2022-067244supp001_data_supplement.pdf]

## Supplementary Materials

**Table S1**

*Severity of symptoms in ISR split by gender (4 participants did not indicate their gender)*

| scale           | gender | N   | none  | suspected | light | medium | severe |
|-----------------|--------|-----|-------|-----------|-------|--------|--------|
| anxiety         | female | 381 | 55.4% | 10.8%     | 19.7% | 10.2%  | 3.9%   |
|                 | male   | 254 | 72%   | 6.7%      | 14.6% | 5.9%   | 0.8%   |
| depression      | female | 381 | 24.1% | 8.4%      | 29.1% | 31.2%  | 7.1%   |
|                 | male   | 254 | 34.6% | 12.6%     | 30.3% | 16.9%  | 5.5%   |
| compulsion      | female | 381 | 57.5% | 8.7%      | 23.6% | 7.3%   | 2.9%   |
|                 | male   | 254 | 68.9% | 7.1%      | 14.6% | 6.7%   | 2.8%   |
| somatoform      | female | 381 | 53.3% | 23.1%     | 8.9%  | 11.5%  | 3.1%   |
|                 | male   | 254 | 59.8% | 24.4%     | 5.9%  | 8.7%   | 1.2%   |
| eating disorder | female | 381 | 36.7% | 8.9%      | 30.7% | 18.6%  | 5%     |
|                 | male   | 254 | 49.2% | 14.6%     | 22%   | 13%    | 1.2%   |
| ISR total       | female | 381 | 38.8% | 5.8%      | 18.6% | 25.7%  | 11%    |
|                 | male   | 254 | 56.3% | 6.3%      | 15.4% | 18.1%  | 3.9%   |

## MENTAL HEALTH OF HEALTHCARE PROFESSIONALS

2

**Table S2***Severity of symptoms in ISR split by age*

| scale           | age   | N   | none  | suspected | light | medium | severe |
|-----------------|-------|-----|-------|-----------|-------|--------|--------|
| anxiety         | <30   | 206 | 57.3% | 6.3%      | 19.4% | 12.1%  | 4.9%   |
|                 | 30-41 | 162 | 55.6% | 13%       | 21%   | 8%     | 2.5%   |
|                 | 42-53 | 147 | 62.6% | 11.6%     | 17.7% | 6.8%   | 1.4%   |
|                 | >53   | 124 | 75.8% | 6.5%      | 11.3% | 4.8%   | 1.6%   |
| depression      | <30   | 206 | 24.3% | 4.9%      | 32.5% | 26.2%  | 12.1%  |
|                 | 30-41 | 162 | 24.1% | 12.3%     | 27.8% | 30.9%  | 4.9%   |
|                 | 42-53 | 147 | 31.3% | 12.2%     | 27.2% | 25.9%  | 3.4%   |
|                 | >53   | 124 | 37.1% | 12.9%     | 30.6% | 16.1%  | 3.2%   |
| compulsion      | <30   | 206 | 58.3% | 9.7%      | 18.9% | 8.7%   | 4.4%   |
|                 | 30-41 | 162 | 63%   | 8%        | 18.5% | 7.4%   | 3.1%   |
|                 | 42-53 | 147 | 63.3% | 5.4%      | 21.8% | 8.2%   | 1.4%   |
|                 | >53   | 124 | 64.5% | 8.9%      | 21.8% | 3.2%   | 1.6%   |
| somatoform      | <30   | 206 | 50.5% | 25.2%     | 7.3%  | 13.1%  | 3.9%   |
|                 | 30-41 | 162 | 56.8% | 27.8%     | 6.8%  | 7.4%   | 1.2%   |
|                 | 42-53 | 147 | 59.2% | 17%       | 8.8%  | 12.9%  | 2%     |
|                 | >53   | 124 | 59.7% | 22.6%     | 8.9%  | 7.3%   | 1.6%   |
| eating disorder | <30   | 206 | 43.7% | 10.2%     | 25.2% | 18%    | 2.9%   |
|                 | 30-41 | 162 | 35.2% | 14.8%     | 26.5% | 17.9%  | 5.6%   |
|                 | 42-53 | 147 | 37.4% | 12.9%     | 27.9% | 17.7%  | 4.1%   |
|                 | >53   | 124 | 50.8% | 6.5%      | 31.5% | 10.5%  | 0.8%   |
| ISR total       | <30   | 206 | 39.3% | 7.8%      | 17%   | 24.3%  | 11.7%  |
|                 | 30-41 | 162 | 40.7% | 4.9%      | 21%   | 25.9%  | 7.4%   |
|                 | 42-53 | 147 | 51%   | 4.1%      | 13.6% | 23.8%  | 7.5%   |
|                 | >53   | 124 | 55.6% | 6.5%      | 18.5% | 15.3%  | 4%     |

## MENTAL HEALTH OF HEALTHCARE PROFESSIONALS

3

**Table S3***Multiple regression of ISR depression scores on stress factors*

| predictor                                         | <i>b</i> | 95% CI        | <i>t</i> (619) | <i>p</i> |
|---------------------------------------------------|----------|---------------|----------------|----------|
| intercept                                         | 0.37     | [0.12, 0.61]  | 2.93           | .003     |
| changes in work procedures                        | 0.09     | [0.02, 0.16]  | 2.53           | .022     |
| protective measures hinder work processes         | 0.11     | [0.03, 0.18]  | 2.93           | .006     |
| protective measures hinder patient contact        | 0.03     | [-0.04, 0.09] | 0.77           | .649     |
| limited contact to colleagues                     | 0.01     | [-0.05, 0.07] | 0.35           | .879     |
| anxiety about self-infection                      | 0.00     | [-0.07, 0.07] | 0.07           | .940     |
| anxiety about infection of family members         | 0.15     | [0.09, 0.22]  | 4.65           | < .001   |
| job insecurity                                    | 0.28     | [0.21, 0.36]  | 7.68           | < .001   |
| increasing number of serious illnesses and deaths | -0.01    | [-0.07, 0.05] | -0.42          | .745     |

*Note.* *b* = unstandardized regression coefficient; CI = confidence interval;  $R^2 = 0.205$ , adjusted  $R^2 = 0.194$ ,  $F(8,616) = 19.83$ ,  $p < .001$

## MENTAL HEALTH OF HEALTHCARE PROFESSIONALS

4

**Table S4***Multiple regression of ISR anxiety scores on stress factors*

| Predictor                                         | <i>b</i> | 95% CI        | <i>t</i> (619) | <i>p</i> |
|---------------------------------------------------|----------|---------------|----------------|----------|
| Intercept                                         | 0.24     | [0.01, 0.46]  | 2.08           | .038     |
| changes in work procedures                        | 0.01     | [-0.05, 0.08] | 0.33           | .847     |
| protective measures hinder work processes         | 0.05     | [-0.02, 0.11] | 1.45           | .262     |
| protective measures hinder patient contact        | 0.00     | [-0.06, 0.06] | -0.13          | .952     |
| limited contact to colleagues                     | 0.00     | [-0.05, 0.06] | 0.14           | .934     |
| anxiety about self-infection                      | 0.03     | [-0.03, 0.10] | 1.05           | .465     |
| anxiety about infection of family members         | 0.10     | [0.04, 0.16]  | 3.28           | .003     |
| job insecurity                                    | 0.17     | [0.10, 0.24]  | 5.01           | < .001   |
| increasing number of serious illnesses and deaths | -0.01    | [-0.06, 0.04] | -0.41          | .847     |

*Note.* *b* = unstandardized regression coefficient; CI = confidence interval;  $R^2 = 0.097$ , adjusted  $R^2 = 0.085$ ,  $F(8,616) = 8.27$ ,  $p < .001$
